# Supplementary material for: Roostocks/Scion/Nitrogen Interactions Affect Secondary Metabolism in the Grape Berry
Source: PubMed Central journal article supplement (PMC4977291; doi:10.3389/fpls.2016.01134), 2016-08-09
Supplement: Table3.pdf [file Table3.pdf]

Supplementary Table 3. Petiole total N content as affected by nitrogen supply. Values are means of 3 independent replicates + SE. N- : 0.8 mM N ; N+ : 3.6 mM N. One factor (N treatment) Anova tests were made, as well as Tukey tests. For each rootstock/variety combination, a and b indicate significantly different values between N- and N+ treatment. †Unique value. Statistical analyses were done using an analysis of variance with years (Y), rootstock (R), treatment (T), variety (V) and their interaction effects (ns,  $P > 0.05$ ; \*,  $P < 0.05$ ; \*\*,  $P < 0.01$ ; \*\*\*,  $P < 0.001$ ).

|             | Cabernet Sauvignon |                | Pinot Noir    |               |
|-------------|--------------------|----------------|---------------|---------------|
|             | RGM                | 110R           | RGM           | 110R          |
| <b>2013</b> |                    |                |               |               |
| N-          | 0.23 ± 0.01 a      | 0.25 ± 0.05 a  | 0.28 †        | 0.21 †        |
| N           | 0.31 ± 0.02 a      | 0.31 ± 0.05 a  | 0.30 †        | 0.21 †        |
| N+          | 0.37 ± 0.12 a      | 0.48 ± 0.18 a  | 0.37 †        | 0.37 †        |
| <b>2014</b> |                    |                |               |               |
| N-          | 0.38 ± 0.10 a      | 0.39 ± 0.04 a  | 0.33 ± 0.01 a | 0.30 ± 0.02 a |
| N           | 0.62 ± 0.02 b      | 0.47 ± 0.04 ab | 0.35 ± 0.03 a | 0.37 ± 0.01 a |
| N+          | 0.66 ± 0.10 b      | 0.55 ± 0.12 b  | 0.63 ± 0.12 b | 0.60 ± 0.08 b |

| <b>Analysis of variance</b> |    |           |           |
|-----------------------------|----|-----------|-----------|
|                             |    | <b>CS</b> | <b>PN</b> |
| Variety                     | NS | -         | -         |
| Year                        | NS | NS        | -         |
| Rootstock                   | NS | NS        | NS        |
