# Supplementary material for: Roostocks/Scion/Nitrogen Interactions Affect Secondary Metabolism in the Grape Berry
Source: PubMed Central journal article supplement (PMC4977291; doi:10.3389/fpls.2016.01134), 2016-08-09
Supplement: Table4.pdf [file Table4.pdf]

Supplementary Table 4. Effect of nitrogen supply on yeast assimilable nitrogen (mg/L) in musts prepared from different rootstocks/scion combinations. In 2014, values are means of 3 independent replicates + SE. †Unique value were made in 2013 ; N- : 0.8 mM N ; N+ : 3.6 mM N. In 2014, one factor (N treatment) Anova tests were made. For each rootstock/variety combination, a, b and c indicate significantly different values between the means.

|             | <b>Cabernet Sauvignon</b> |                  | <b>Pinot Noir</b> |                  |
|-------------|---------------------------|------------------|-------------------|------------------|
|             | <b>RGM</b>                | <b>110R</b>      | <b>RGM</b>        | <b>110R</b>      |
| <b>2013</b> |                           |                  |                   |                  |
| N-          | 120.00 †                  | 180.00 †         | 180.00 †          | 164.00 †         |
| N           | 147.00 †                  | 255.00 †         | 187.00 †          | 180.00 †         |
| N+          | 241.00 †                  | 252.00 †         | 215.00 †          | 223.00 †         |
| <b>2014</b> |                           |                  |                   |                  |
| N-          | 252.67 ± 45.79 a          | 295.67 ± 30.83 a | 268.00 ± 07.21 a  | 260.33 ± 47.35 a |
| N           | 283.00 ± 24.98 b          | 280.00 ± 24.64 a | 233.00 ± 14.18 a  | 214.33 ± 15.57 a |
| N+          | 410.33 ± 11.68 c          | 490.00 ± 26.00 b | 518.00 ± 25.87 b  | 568.00 ± 47.29 b |
